# Supplementary material for: Design of two-component molecular crystals with defined melting points
Source: Royal Society of Chemistry journal article supplement (doi:10.1039/d3ce00037k), 2023-01-01
Supplement: d3ce00037k1.pdf [file d3ce00037k1.pdf]

# Supporting Information

for publication

## Design of two-component molecular crystals with defined melting points

*German L. Perlovich*

G.A. Krestov Institute of Solution Chemistry of the Russian Academy of Sciences, 1

Akademicheskaya St., Ivanovo, 153045, Russian Federation

Corresponding author: [glp@isc-ras.ru](mailto:glp@isc-ras.ru)

**Table 1S.** Coefficients of the correlation equation (1) for the clusters including the considered compound as a one from the components of the two-component crystal

| N <sup>o</sup> | CF1                        | CF1:CF2    | A             | B                  | R <sup>a</sup> | $\sigma^b$   | n <sup>c</sup> | $T_{fus} / ^\circ\text{C}$ | L        | B        | H        | $T_{fus}^E / \text{K}$ | $T_{fus}^F / \text{K}$ | $ T_{fus}^W  / \text{K}$ | $2\sigma^b$ | $T_{fus}^E / ^\circ\text{C}$ | $T_{fus}^F / ^\circ\text{C}$ |
|----------------|----------------------------|------------|---------------|--------------------|----------------|--------------|----------------|----------------------------|----------|----------|----------|------------------------|------------------------|--------------------------|-------------|------------------------------|------------------------------|
| 1              | 1-hydroxy-2-naphthoic acid | 1:1        | 202±59        | 0.525±0.136        | 0.8246         | 23.30        | 9              | 192.0                      | 1        | 1        | 0        | 425.3                  | 501.2                  | 76.0                     | 46.6        | 152.1                        | 228.1                        |
| 2              | 2,3,5,6-F-4-I-Benzoic Acid | 1:1        | 31±77         | 1.065±0.211        | 0.9458         | 12.00        | 5              | 151.0                      | 0        | 1        | 1        | -476.9                 | 369.2                  | 846.1                    | 24          | -750.1                       | 96.0                         |
| 3              | 2,4-OH-Benzoic Acid        | 1:1        | 119±41        | 0.717±0.089        | 0.9309         | 15.90        | 12             | 213.0                      | 1        | 1        | 0        | 420.5                  | 512.1                  | 91.6                     | 31.8        | 147.3                        | 238.9                        |
| 4              | 2-Acetaminopyridine        | 2:1        | 150±46        | 0.579±0.104        | 0.8922         | 20.50        | 10             | 69.0                       | 0        | 1        | 0        | 356.3                  | 331.9                  | 24.4                     | 41.0        | 83.1                         | 58.7                         |
| 5              | 2-OH-Benzamide             | 1:1        | 214±36        | 0.441±0.080        | 0.9006         | 10.90        | 9              | 140.8                      | 1        | 1        | 0        | 382.8                  | 453.4                  | 70.6                     | 21.8        | 109.7                        | 180.3                        |
| 6              | 2-Pyridone                 | 1:1        | 105±51        | 0.657±0.121        | 0.9121         | 16.80        | 8              | 107.8                      | 1        | 1        | 0        | 306.1                  | 420.0                  | 113.9                    | 33.6        | 33.0                         | 146.9                        |
| 7              | 3,5-OH-Benzoic Acid        | 1:1        | 255±39        | 0.522±0.081        | 0.9335         | 19.10        | 8              | 237.5                      | 0        | 1        | 1        | 533.5                  | 489.8                  | 43.7                     | 38.2        | 260.3                        | 216.6                        |
| 8              | 3-OH-Benzoic Acid          | 1:1        | 241±22        | 0.404±0.047        | 0.9032         | 15.20        | 19             | 203.0                      | 1        | 1        | 0        | 404.4                  | 582.1                  | 177.7                    | 30.4        | 131.2                        | 308.9                        |
| 9              | 4-Bromobenzamide           | 2:1        | 142±115       | 0.704±0.271        | 0.7576         | 19.80        | 7              | 191.5                      | 0        | 1        | 0        | 479.7                  | 458.3                  | 21.4                     | 39.6        | 206.6                        | 185.2                        |
| 10             | 4-nitro-Phenol             | 1:1        | 175±39        | 0.612±0.097        | 0.9031         | 19.30        | 11             | 113.5                      | 0        | 1        | 1        | 451.0                  | 345.8                  | 105.2                    | 38.6        | 177.9                        | 72.7                         |
| 11             | 4-Phenylpyridine           | 1:1        | 182±44        | 0.449±0.111        | 0.8964         | 14.40        | 6              | 69.5                       | 0        | 1        | 0        | 330.3                  | 357.8                  | 27.5                     | 28.8        | 57.2                         | 84.6                         |
| 12             | p-toluenesulfonic acid     | 1:1        | 17±20         | 0.988±0.040        | 0.9967         | 5.60         | 6              | 106.5                      | 0        | 1        | 1        | 1416.7                 | 367.1                  | 1049.6                   | 11.2        | 1143.5                       | 93.9                         |
| 13             | Aakeroy_1                  | 1:2        | 251±39        | 0.421±0.099        | 0.8854         | 12.20        | 7              | 158.5                      | 0        | 1        | 0        | 433.5                  | 429.1                  | 4.4                      | 24.4        | 160.4                        | 155.9                        |
| 14             | Acetazolamide              | 1:1        | 162±39        | 0.698±0.940        | 0.9339         | 15.70        | 10             | 258.5                      | 0        | 1        | 0        | 536.4                  | 529.6                  | 6.8                      | 31.4        | 263.3                        | 256.4                        |
| 15             | Acridine                   | 1:1        | 8±55          | 0.905±0.122        | 0.8988         | 18.00        | 15             | 108.5                      | 1        | 1        | 0        | 84.2                   | 412.9                  | 328.7                    | 36.0        | -188.9                       | 139.7                        |
| 16             | AMG517                     | 1:1        | 207±35        | 0.593±0.089        | 0.8871         | 15.60        | 14             | 230.0                      | 0        | 1        | 0        | 508.6                  | 499.4                  | 9.2                      | 31.2        | 235.4                        | 226.3                        |
| 17             | Arbidol                    | 1:1        | 329±28        | 0.190±0.061        | 0.8728         | 8.02         | 5              | 124.8                      | 0        | 1        | 1        | 406.2                  | 362.9                  | 43.3                     | 16.04       | 133.0                        | 89.7                         |
| 18             | Benzamide                  | 1:1        | 151±39        | 0.561±0.082        | 0.9215         | 13.10        | 9              | 128.5                      | 1        | 1        | 0        | 344.0                  | 446.8                  | 102.8                    | 26.2        | 70.8                         | 173.6                        |
| 19             | Benzoic Acid               | 1:1        | 97±45         | 0.701±0.701        | 0.8319         | 27.40        | 24             | 122.0                      | 1        | 1        | 0        | 324.4                  | 425.3                  | 100.9                    | 54.8        | 51.3                         | 152.2                        |
| <b>20</b>      | <b>Benzotrifuroxan</b>     | <b>1:1</b> | <b>231±38</b> | <b>0.545±0.091</b> | <b>0.9488</b>  | <b>12.50</b> | <b>6</b>       | <b>197.4</b>               | <b>0</b> | <b>1</b> | <b>1</b> | <b>507.7</b>           | <b>439.5</b>           | <b>68.2</b>              | <b>25.0</b> | <b>234.5</b>                 | <b>166.4</b>                 |
| 21             | 1,2-bis(4-pyridyl)propane  | 1:1        | 252±32        | 0.361±0.072        | 0.8455         | 17.50        | 12             | 54.5                       | 0        | 1        | 1        | 394.4                  | 209.6                  | 184.8                    | 35.0        | 121.2                        | -63.6                        |
| 22             | trans-Cinnamic Acid        | 1:1        | 168±36        | 0.523±0.079        | 0.9469         | 9.56         | 7              | 134.0                      | 1        | 1        | 0        | 352.2                  | 457.3                  | 105.1                    | 19.12       | 79.1                         | 184.1                        |
| 23             | Clotrimazole               | 1:1        | 210±41        | 0.461±0.091        | 0.9298         | 7.36         | 6              | 148.0                      | 1        | 1        | 0        | 389.6                  | 458.0                  | 68.4                     | 14.72       | 116.5                        | 184.9                        |
| 24             | Dapson                     | 1:1        | 208±36        | 0.484±0.087        | 0.9407         | 10.80        | 6              | 177.5                      | 1        | 1        | 0        | 403.1                  | 501.3                  | 98.2                     | 21.6        | 130.0                        | 228.2                        |
| 25             | Edaravone                  | 1:1        | 165±29        | 0.421±0.099        | 0.9690         | 11.50        | 7              | 128.0                      | 1        | 1        | 0        | 285.0                  | 560.9                  | 276.0                    | 23.0        | 11.8                         | 287.8                        |
| 26             | Febuxostat                 | 1:1        | 328±31        | 0.266±0.070        | 0.8400         | 9.28         | 7              | 201.0                      | 1        | 1        | 0        | 446.9                  | 549.4                  | 102.6                    | 18.56       | 173.7                        | 276.3                        |
| 27             | Flufenamic Acid            | 1:1        | 190±37        | 0.544±0.083        | 0.9563         | 11.60        | 6              | 133.9                      | 0        | 1        | 0        | 416.7                  | 399.0                  | 17.7                     | 23.2        | 143.5                        | 125.8                        |
| 28             | Furosemide                 | 1:1        | 264±24        | 0.406±0.055        | 0.8870         | 19.40        | 17             | 203.0                      | 1        | 1        | 0        | 444.4                  | 522.5                  | 78.1                     | 38.8        | 171.3                        | 249.4                        |
| 29             | Gabapentin                 | 1:1        | 205±31        | 0.470±0.071        | 0.9198         | 6.74         | 10             | 161.0                      | 1        | 1        | 0        | 386.8                  | 487.6                  | 100.8                    | 13.48       | 113.6                        | 214.4                        |
| 30             | Glycolic Acid              | 1:1        | 209±34        | 0.414±0.069        | 0.9492         | 8.62         | 6              | 75.0                       | 0        | 1        | 1        | 356.7                  | 336.1                  | 20.5                     | 17.24       | 83.5                         | 63.0                         |
| <b>31</b>      | <b>Imatinib mesylate</b>   | <b>1:1</b> | <b>375±12</b> | <b>0.175±0.022</b> | <b>0.9397</b>  | <b>4.30</b>  | <b>10</b>      | <b>223.3</b>               | <b>1</b> | <b>1</b> | <b>0</b> | <b>454.5</b>           | <b>694.0</b>           | <b>239.5</b>             | <b>8.6</b>  | <b>181.4</b>                 | <b>420.9</b>                 |
| 32             | Indomethacin               | 1:1        | 181±37        | 0.548±0.081        | 0.9490         | 10.20        | 7              | 160.8                      | 1        | 1        | 0        | 400.4                  | 461.6                  | 61.1                     | 20.4        | 127.3                        | 188.4                        |
| 33             | Lamotrigine                | 1:1        | 45±12         | 0.980±0.027        | 0.9988         | 2.83         | 5              | 217.3                      | 0        | 1        | 1        | 2250.0                 | 454.5                  | 1795.5                   | 5.66        | 1976.9                       | 181.4                        |
| 34             | Lornoxicam                 | 1:1        | 364±24        | 0.246±0.057        | 0.9274         | 5.88         | 5              | 227.5                      | 1        | 1        | 0        | 482.8                  | 555.5                  | 72.7                     | 11.76       | 209.6                        | 282.3                        |
| 35             | Maleic Acid                | 1:1        | 166±30        | 0.585±0.064        | 0.9127         | 15.80        | 19             | 139.0                      | 0        | 1        | 0        | 400.0                  | 420.8                  | 20.8                     | 31.6        | 126.9                        | 147.6                        |

|           |                              |            |     |               |                    |               |              |           |              |          |          |          |              |              |              |             |              |              |
|-----------|------------------------------|------------|-----|---------------|--------------------|---------------|--------------|-----------|--------------|----------|----------|----------|--------------|--------------|--------------|-------------|--------------|--------------|
| 36        | L-Malic Acid                 | 1:1        | 1:2 | 131±55        | 0.678±0.117        | 0.9215        | 14.00        | 8         | 101.0        | 0        | 1        | 1        | 406.8        | 358.6        | 48.2         | 28.0        | 133.7        | 85.5         |
| 37        | Malonic Acid                 | 1:1        |     | 168±49        | 0.541±0.100        | 0.8632        | 17.40        | 12        | 136.0        | 1        | 1        | 0        | 366.0        | 445.7        | 79.7         | 34.8        | 92.9         | 172.6        |
| 38        | Methyl-Paraben               | 1:1        |     | -15±18        | 0.911±0.039        | 0.9956        | 4.55         | 7         | 126.5        | 1        | 1        | 0        | -168.5       | 455.2        | 623.7        | 9.1         | -441.7       | 182.0        |
| 39        | Meloxicam                    | 1:1        |     | 251±37        | 0.508±0.087        | 0.8688        | 14.50        | 13        | 254.0        | 1        | 1        | 0        | 510.2        | 543.6        | 33.4         | 29.0        | 237.0        | 270.5        |
| 40        | Nicotinic Acid               | 1:1        |     | 46±38         | 0.873±0.079        | 0.9724        | 15.90        | 9         | 232.0        | 1        | 1        | 0        | 362.2        | 525.9        | 163.7        | 31.8        | 89.1         | 252.8        |
| 41        | Norfloracin                  | 1:1        |     | 245±52        | 0.485±0.114        | 0.8493        | 22.50        | 9         | 220.6        | 0        | 1        | 0        | 475.7        | 512.9        | 37.2         | 45.0        | 202.6        | 239.7        |
| 42        | p-Coumaric acid              | 1:1        |     | 296±18        | 0.338±0.040        | 0.9535        | 7.22         | 9         | 211.5        | 1        | 1        | 0        | 447.1        | 558.1        | 111.0        | 14.44       | 174.0        | 285.0        |
| 43        | Paracetamol                  | 1:1        |     | 297±17        | 0.272±0.037        | 0.9338        | 6.97         | 10        | 170.0        | 1        | 1        | 0        | 408.0        | 537.3        | 129.3        | 13.94       | 134.8        | 264.2        |
| 44        | Phenazine                    | 1:1        | 2:1 | 16±83         | 0.968±0.178        | 0.9252        | 25.90        | 7         | 177.0        | 0        | 1        | 1        | 500.0        | 448.5        | 51.5         | 51.8        | 226.9        | 175.4        |
| 45        | Pimelic Acid                 | 1:1        | 1:2 | 144±46        | 0.592±0.110        | 0.8626        | 13.30        | 12        | 104.0        | 1        | 1        | 0        | 352.9        | 393.8        | 40.9         | 26.6        | 79.8         | 120.7        |
| 46        | Pyrazinamide                 | 1:1        |     | 145±29        | 0.609±0.062        | 0.8569        | 13.50        | 37        | 189.0        | 1        | 1        | 0        | 370.8        | 520.8        | 149.9        | 27.0        | 97.7         | 247.6        |
| 47        | Resorcinol                   | 1:1        |     | 235±45        | 0.474±0.097        | 0.8786        | 14.30        | 9         | 110.5        | 0        | 1        | 1        | 446.8        | 313.6        | 133.2        | 28.6        | 173.6        | 40.5         |
| <b>48</b> | <b>Saccharin</b>             | <b>1:1</b> |     | <b>242±21</b> | <b>0.459±0.047</b> | <b>0.8504</b> | <b>13.50</b> | <b>39</b> | <b>227.9</b> | <b>1</b> | <b>1</b> | <b>0</b> | <b>447.3</b> | <b>564.4</b> | <b>117.1</b> | <b>27.0</b> | <b>174.2</b> | <b>291.2</b> |
| 49        | 2-OH-Benzoic Acid            | 1:1        |     | 189±35        | 0.533±0.073        | 0.8305        | 20.20        | 26        | 159.0        | 1        | 1        | 0        | 404.7        | 456.2        | 51.5         | 40.4        | 131.6        | 183.0        |
| 50        | Sulfadimidine                | 1:1        |     | 337±28        | 0.284±0.060        | 0.7036        | 12.80        | 25        | 197.0        | 0        | 1        | 0        | 470.7        | 468.8        | 1.8          | 25.6        | 197.5        | 195.7        |
| 51        | Tefagur                      | 1:1        |     | 288±58        | 0.262±0.126        | 0.7683        | 15.50        | 5         | 171.7        | 1        | 1        | 0        | 390.2        | 598.7        | 208.4        | 31.0        | 117.1        | 325.5        |
| 52        | Tenoxicam                    | 1:1        |     | 324±72        | 0.341±0.182        | 0.7348        | 7.76         | 5         | 209.5        | 0        | 1        | 1        | 491.7        | 465.2        | 26.4         | 15.52       | 218.5        | 192.1        |
| 53        | Theophylline                 | 1:1        |     | 197±33        | 0.571±0.075        | 0.8079        | 18.50        | 33        | 273.6        | 1        | 1        | 0        | 459.2        | 612.5        | 153.3        | 37.0        | 186.1        | 339.4        |
| <b>54</b> | <b>2,4,6-Trinitrotoluene</b> | <b>1:1</b> |     | <b>242±27</b> | <b>0.331±0.063</b> | <b>0.8451</b> | <b>14.60</b> | <b>13</b> | <b>80.5</b>  | <b>0</b> | <b>1</b> | <b>0</b> | <b>361.7</b> | <b>337.3</b> | <b>24.4</b>  | <b>29.2</b> | <b>88.6</b>  | <b>64.2</b>  |
| 55        | Urea                         | 1:1        |     | 210±42        | 0.504±0.088        | 0.8041        | 17.40        | 20        | 134.3        | 0        | 1        | 0        | 423.4        | 391.8        | 31.6         | 34.8        | 150.2        | 118.6        |
| 56        | Vanillic Acid                | 1:1        | 2:1 | 285±26        | 0.308±0.053        | 0.9104        | 10.90        | 9         | 209.2        | 1        | 1        | 0        | 411.8        | 640.7        | 228.9        | 21.8        | 138.7        | 367.6        |
| 57        | Adefovir dipivoxil           | 1:1        |     | 234±55        | 0.375±0.126        | 0.8303        | 15.30        | 6         | 93.3         | 0        | 1        | 0        | 374.4        | 353.2        | 21.2         | 30.6        | 101.3        | 80.1         |
| 58        | Diethylstilbestrol           | 1:1        | 1:2 | 35±39         | 0.997±0.144        | 0.9516        | 13.50        | 7         | 182.1        | 0        | 1        | 1        | 11666.7      | 421.5        | 11245.2      | 27.0        | 11393.5      | 148.4        |
| 59        | Itraconazole                 | 1:1        | 2:1 | 87±44         | 0.780±0.104        | 0.9424        | 11.20        | 9         | 166.2        | 1        | 1        | 0        | 395.5        | 451.7        | 56.3         | 22.4        | 122.3        | 178.6        |
| 60        | Resveratrol                  | 1:1        | 1:2 | 252±57        | 0.457±0.125        | 0.9034        | 16.40        | 5         | 267.7        | 0        | 1        | 1        | 464.1        | 632.1        | 168.0        | 32.8        | 190.9        | 358.9        |
| 61        | Stanozolol                   | 1:1        |     | 282±99        | 0.416±0.214        | 0.7466        | 19.00        | 5         | 244.3        | 1        | 1        | 0        | 482.9        | 566.0        | 83.1         | 38.0        | 209.7        | 292.8        |
| 62        | 4-Aminobenzoic Acid          | 1:1        |     | 156±22        | 0.621±0.047        | 0.9396        | 13.60        | 25        | 189.0        | 1        | 1        | 0        | 411.6        | 493.0        | 81.4         | 27.2        | 138.5        | 219.8        |
| 63        | Flurbiprofen                 | 1:1        |     | 117±45        | 0.629±0.096        | 0.8914        | 16.90        | 13        | 109.3        | 1        | 1        | 0        | 315.4        | 422.0        | 106.7        | 33.8        | 42.2         | 148.9        |
| 64        | Glutaric acid                |            | 1:2 | 254±38        | 0.372±0.078        | 0.9217        | 15.70        | 6         | 96.5         | 0        | 1        | 1        | 404.5        | 310.9        | 93.6         | 31.4        | 131.3        | 37.7         |
| 65        | Oxalic Acid                  |            | 1:2 | 144±56        | 0.695±0.123        | 0.8528        | 25.10        | 14        | 189.0        | 0        | 1        | 0        | 472.1        | 457.8        | 14.4         | 50.2        | 199.0        | 184.6        |
| 66        | Pyrazine                     |            | 1:2 | 1±19          | 0.997±0.045        | 0.9929        | 11.60        | 9         | 52.0         | 0        | 1        | 0        | 333.3        | 325.1        | 8.2          | 23.2        | 60.2         | 52.0         |
| 67        | Quercetin                    |            | 1:2 | 204±84        | 0.567±0.159        | 0.8032        | 24.50        | 9         | 321.4        | 1        | 1        | 0        | 471.1        | 688.8        | 217.7        | 49.0        | 198.0        | 415.7        |
| 68        | D- or L-Tartaric Acid        | 1:1        |     | 59±23         | 0.801±0.047        | 0.9881        | 5.18         | 9         | 166.0        | 1        | 1        | 0        | 296.5        | 474.6        | 178.1        | 10.36       | 23.3         | 201.4        |
| 69        | Sebacic acid                 | 1:1        |     | 233±53        | 0.465±0.127        | 0.8532        | 17.70        | 7         | 132.0        | 0        | 1        | 1        | 435.5        | 370.2        | 65.3         | 35.4        | 162.4        | 97.1         |
| 70        | 1,2-bis(4-pyridyl)ethylene   | 1:1        |     | 262±41        | 0.419±0.089        | 0.8561        | 16.50        | 10        | 151.5        | 0        | 1        | 1        | 451.0        | 388.2        | 62.8         | 33.0        | 177.8        | 115.0        |

|          |                                     |            |  |               |                    |               |              |           |              |          |          |          |              |              |             |             |              |              |
|----------|-------------------------------------|------------|--|---------------|--------------------|---------------|--------------|-----------|--------------|----------|----------|----------|--------------|--------------|-------------|-------------|--------------|--------------|
| <b>1</b> | <b>1,4-diiidotetrafluorobenzene</b> | <b>1:1</b> |  | <b>106±32</b> | <b>0.738±0.083</b> | <b>0.9168</b> | <b>20.70</b> | <b>17</b> | <b>109.0</b> | <b>0</b> | <b>1</b> | <b>0</b> | <b>404.6</b> | <b>374.2</b> | <b>30.4</b> | <b>41.4</b> | <b>131.4</b> | <b>101.0</b> |
|----------|-------------------------------------|------------|--|---------------|--------------------|---------------|--------------|-----------|--------------|----------|----------|----------|--------------|--------------|-------------|-------------|--------------|--------------|

|    |                               |            |               |                    |               |              |          |              |          |          |          |              |              |             |             |              |              |
|----|-------------------------------|------------|---------------|--------------------|---------------|--------------|----------|--------------|----------|----------|----------|--------------|--------------|-------------|-------------|--------------|--------------|
|    | 1,4-diidodotetrafluorobenzene | 1:2        | 271±62        | 0.306±0.171        | 0.4313        | 25.40        | 16       | 109.0        | 0        | 1        | 0        | 390.5        | 363.2        | 27.3        | 50.8        | 117.3        | 90.1         |
| 2  | 4-OH-Benzoic Acid             | 1:1        | 128±24        | 0.702±0.054        | 0.9228        | 14.60        | 31       | 214.5        | 1        | 1        | 0        | 429.5        | 512.3        | 82.8        | 29.2        | 156.4        | 239.2        |
|    | 4-OH-Benzoic Acid             | 2:1        | 295±40        | 0.446±0.097        | 0.8990        | 19.10        | 7        | 214.5        | 0        | 1        | 1        | 532.5        | 432.0        | 100.5       | 38.2        | 259.3        | 158.8        |
| 3  | Adipic Acid                   | 1:1        | 156±43        | 0.644±0.098        | 0.9003        | 15.00        | 12       | 152.1        | 0        | 1        | 0        | 438.2        | 418.1        | 20.1        | 30.0        | 165.1        | 144.9        |
|    | Adipic Acid                   | 1:2        | 148±35        | 0.628±0.077        | 0.9040        | 17.00        | 17       | 152.1        | 1        | 1        | 0        | 397.8        | 441.5        | 43.6        | 34.0        | 124.7        | 168.3        |
| 4  | 1,2-bis-(4-pyridyl)ethane     | 1:1        | 300±22        | 0.305±0.049        | 0.8396        | 14.30        | 18       | 112.0        | 0        | 1        | 1        | 431.7        | 279.2        | 152.5       | 28.6        | 158.5        | 6.0          |
|    | 1,2-bis-(4-pyridyl)ethane     | 1:2        | 236±33        | 0.402±0.078        | 0.8906        | 14.80        | 9        | 112.0        | 0        | 1        | 0        | 394.6        | 371.0        | 23.6        | 29.6        | 121.5        | 97.9         |
| 5  | Caffeine                      | 1:1        | 132±21        | 0.673±0.045        | 0.9512        | 16.00        | 26       | 227.0        | 1        | 1        | 0        | 403.7        | 547.0        | 143.4       | 32.0        | 130.5        | 273.9        |
|    | Caffeine                      | 2:1        | 223±30        | 0.445±0.063        | 0.9623        | 10.20        | 6        | 227.0        | 1        | 1        | 0        | 401.8        | 622.8        | 221.0       | 20.4        | 128.7        | 349.7        |
| 6  | Carbamazepine                 | 1:1        | 245±15        | 0.415±0.032        | 0.8990        | 11.50        | 42       | 190.1        | 1        | 1        | 0        | 418.8        | 525.9        | 107.1       | 23.0        | 145.7        | 252.8        |
|    | Carbamazepine                 | 2:1        | 275±61        | 0.369±0.142        | 0.6544        | 18.30        | 11       | 190.1        | 1        | 1        | 0        | 435.8        | 510.2        | 74.3        | 36.6        | 162.7        | 237.0        |
| 7  | <b>CL20</b>                   | <b>1:2</b> | <b>114±78</b> | <b>0.743±0.176</b> | <b>0.9039</b> | <b>24.10</b> | <b>6</b> | <b>244.0</b> | <b>1</b> | <b>1</b> | <b>0</b> | <b>443.6</b> | <b>542.6</b> | <b>99.0</b> | <b>48.2</b> | <b>170.4</b> | <b>269.4</b> |
|    | CL20                          | 2:1        | 118±22        | 0.712±0.044        | 0.9963        | 7.93         | 4        | 244.0        | 1        | 1        | 0        | 409.7        | 560.6        | 150.9       | 15.86       | 136.6        | 287.5        |
| 8  | Fumaric Acid                  | 1:1        | 303±30        | 0.324±0.065        | 0.7802        | 17.80        | 18       | 287.0        | 1        | 1        | 0        | 448.2        | 793.7        | 345.4       | 35.6        | 175.1        | 520.5        |
|    | Fumaric Acid                  | 1:2        | 103±28        | 0.772±0.063        | 0.9261        | 19.10        | 27       | 287.0        | 1        | 1        | 0        | 451.8        | 592.2        | 140.4       | 38.2        | 178.6        | 319.0        |
| 9  | Gallic Acid                   | 1:1        | 236±62        | 0.547±0.138        | 0.8318        | 15.40        | 9        | 250.0        | 0        | 1        | 0        | 521.0        | 525.0        | 4.0         | 30.8        | 247.8        | 251.8        |
|    | Gallic Acid                   | 1:2        | 164±27        | 0.638±0.064        | 0.9807        | 6.31         | 6        | 250.0        | 1        | 1        | 0        | 453.0        | 562.9        | 109.9       | 12.62       | 179.9        | 289.8        |
| 10 | Hydrochlorothiazide           | 1:1        | 104±44        | 0.839±0.105        | 0.9428        | 16.40        | 10       | 269.0        | 0        | 1        | 1        | 646.0        | 522.2        | 123.7       | 32.8        | 372.8        | 249.1        |
|    | Hydrochlorothiazide           | 1:2        | 272±24        | 0.385±0.061        | 0.9642        | 7.37         | 5        | 269.0        | 1        | 1        | 0        | 442.3        | 701.7        | 259.4       | 14.74       | 169.1        | 428.5        |
| 11 | Isoniazid                     | 1:1        | 195±23        | 0.495±0.052        | 0.8782        | 14.50        | 29       | 171.5        | 1        | 1        | 0        | 386.1        | 504.3        | 118.2       | 29.0        | 113.0        | 231.2        |
|    | Isoniazid                     | 2:1        | 271±30        | 0.316±0.063        | 0.8582        | 12.80        | 11       | 171.5        | 1        | 1        | 0        | 396.2        | 549.5        | 153.3       | 25.6        | 123.0        | 276.4        |
| 12 | Isonicotinamide               | 1:1        | 243±26        | 0.420±0.059        | 0.7533        | 21.90        | 41       | 156.0        | 0        | 1        | 0        | 419.0        | 443.2        | 24.2        | 43.8        | 145.8        | 170.1        |
|    | Isonicotinamide               | 2:1        | 265±23        | 0.400±0.051        | 0.8919        | 14.30        | 18       | 156.0        | 0        | 1        | 1        | 441.7        | 410.4        | 31.3        | 28.6        | 168.5        | 137.2        |
|    | Isonicotinamide               | 1:2        | 220±27        | 0.513±0.064        | 0.9704        | 7.36         | 6        | 156.0        | 0        | 1        | 1        | 451.7        | 407.7        | 44.0        | 14.72       | 178.6        | 134.5        |
| 13 | D- or L-Proline               | 1:1        | 258±14        | 0.413±0.030        | 0.9394        | 11.80        | 27       | 228.0        | 1        | 1        | 0        | 439.5        | 588.7        | 149.2       | 23.6        | 166.4        | 315.6        |
|    | D- or L-Proline               | 1:2        | 246±34        | 0.475±0.084        | 0.9423        | 4.22         | 6        | 228.0        | 1        | 1        | 0        | 468.6        | 537.2        | 68.6        | 8.44        | 195.4        | 264.0        |
| 14 | Naproxen                      | 1:1        | 135±32        | 0.604±0.069        | 0.9407        | 10.70        | 12       | 155.6        | 1        | 1        | 0        | 340.9        | 486.3        | 145.4       | 21.4        | 67.8         | 213.2        |
|    | Naproxen                      | 2:1        | 263±27        | 0.349±0.063        | 0.9413        | 7.62         | 6        | 155.6        | 1        | 1        | 0        | 404.0        | 474.9        | 70.9        | 15.24       | 130.8        | 201.8        |
| 15 | Nicotinamide                  | 1:1        | 178±15        | 0.514±0.033        | 0.8936        | 15.60        | 63       | 128.4        | 1        | 1        | 0        | 366.3        | 434.9        | 68.7        | 31.2        | 93.1         | 161.8        |
|    | Nicotinamide                  | 1:2        | -73±71        | 1.086±0.151        | 0.9381        | 16.80        | 9        | 128.4        | 1        | 1        | 0        | 848.8        | 437.0        | 411.9       | 33.6        | 575.7        | 163.8        |
|    | Nicotinamide                  | 2:1        | 268±28        | 0.322±0.058        | 0.8907        | 14.30        | 10       | 128.4        | 0        | 1        | 0        | 395.3        | 414.8        | 19.5        | 28.6        | 122.1        | 141.6        |
| 16 | Riluzole                      | 1:1        | 319±45        | 0.216±0.102        | 0.6237        | 12.60        | 9        | 118.0        | 0        | 1        | 1        | 406.9        | 334.0        | 72.9        | 25.2        | 133.7        | 60.9         |
|    | Riluzole                      | 2:1        | 165±58        | 0.555±0.140        | 0.8706        | 11.60        | 7        | 118.0        | 1        | 1        | 0        | 370.8        | 407.5        | 36.7        | 23.2        | 97.6         | 134.3        |
| 17 | Succinic Acid                 | 1:1        | 276±24        | 0.371±0.053        | 0.7952        | 20.90        | 31       | 184.0        | 1        | 1        | 0        | 438.8        | 488.3        | 49.5        | 41.8        | 165.6        | 215.1        |
|    | Succinic Acid                 | 1:2        | 155±30        | 0.624±0.067        | 0.8666        | 17.00        | 31       | 184.0        | 1        | 1        | 0        | 412.2        | 484.2        | 72.0        | 34          | 139.1        | 211.1        |

<sup>a</sup> Pair correlation coefficient;

<sup>b</sup> Standard deviation;

<sup>c</sup> A number of points in the cluster;

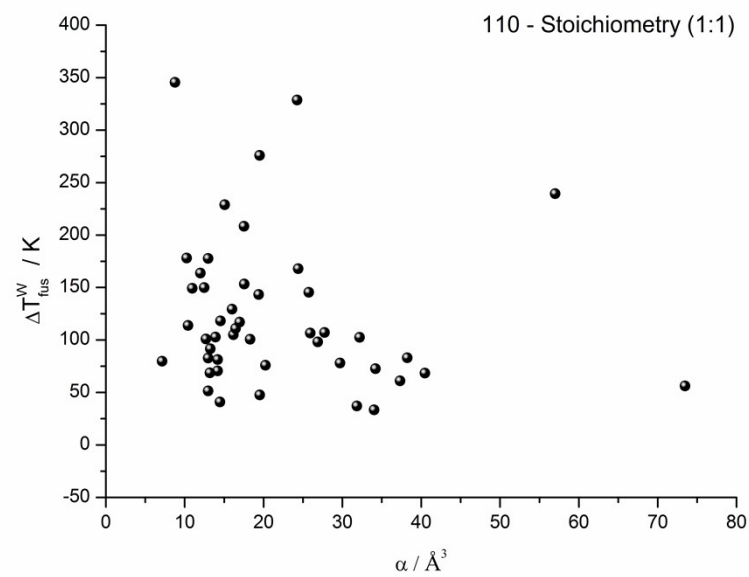

a

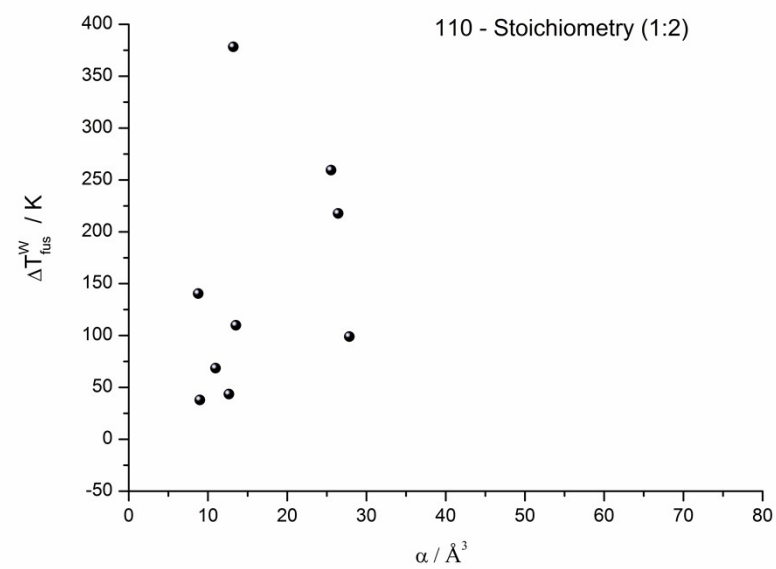

b

**Figure S1.** Dependence  $\Delta T_{fus}^W$  versus  $\alpha$  (molecular polarizability for CF1).  $\Delta T_{fus}^W$ -values correspond to (110) correlation lines location for stoichiometries (1:1) (a) and (1:2) (b).

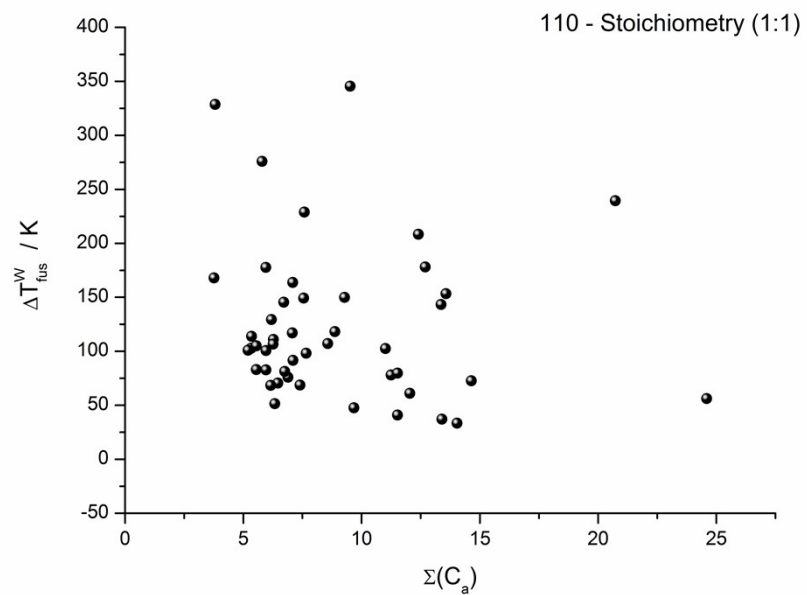

a

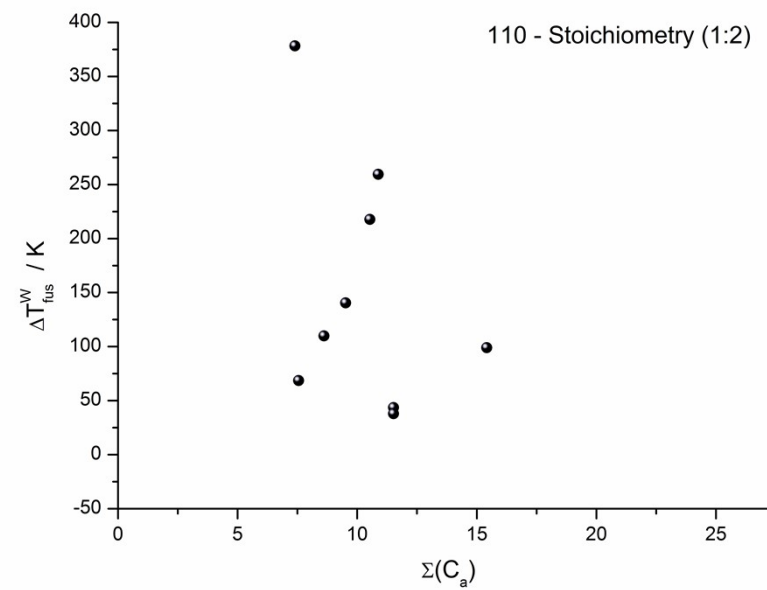

b

**Figure S2.** Dependence  $\Delta T_{fus}^W$  versus  $\Sigma(C_a)$  (the sum of all H-bond acceptor factors in a molecule CF1).  $\Delta T_{fus}^W$ -values correspond to (110) correlation lines location for stoichiometries (1:1) (a) and (1:2) (b).

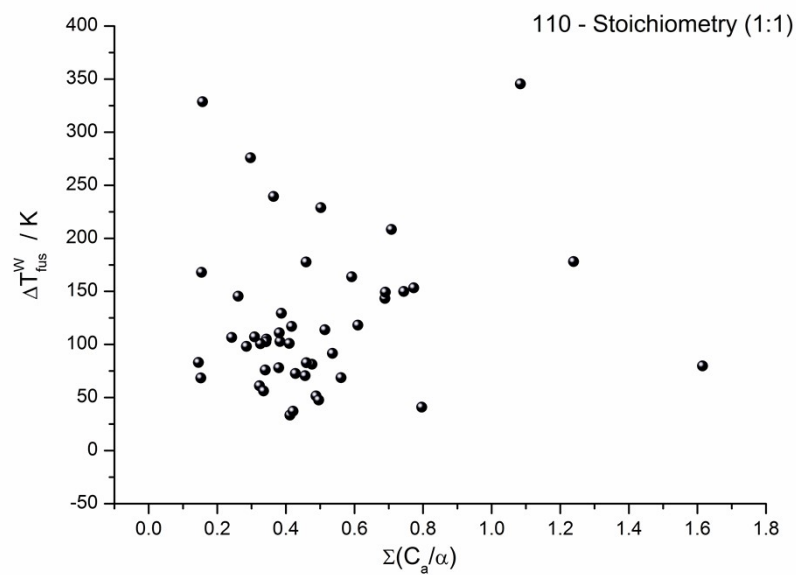

a

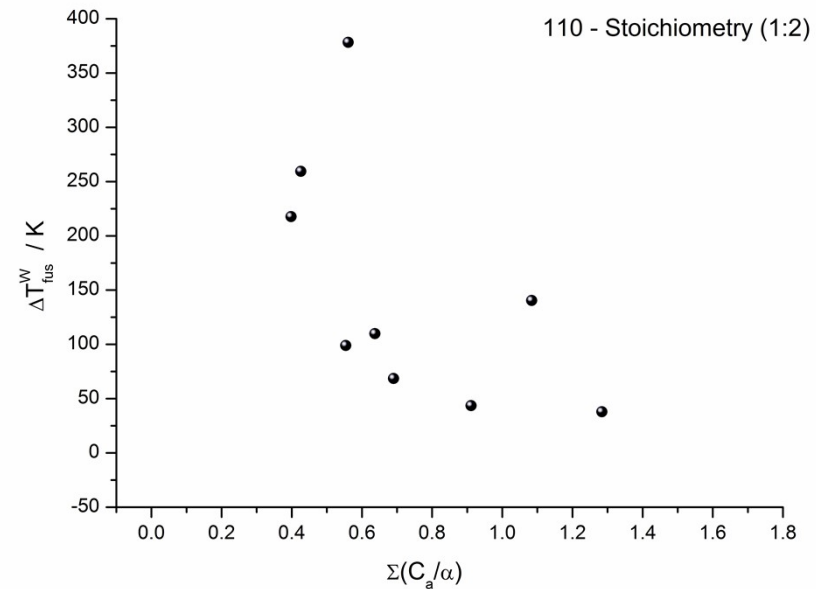

b

**Figure S3.** Dependence  $\Delta T_{fus}^W$  versus  $\Sigma(C_a/\alpha)$  (the sum of all H-bond acceptor factors in a molecule CF1 normalized on polarizability).  $\Delta T_{fus}^W$ -values correspond to (110) correlation lines location for stoichiometries (1:1) (a) and (1:2) (b).

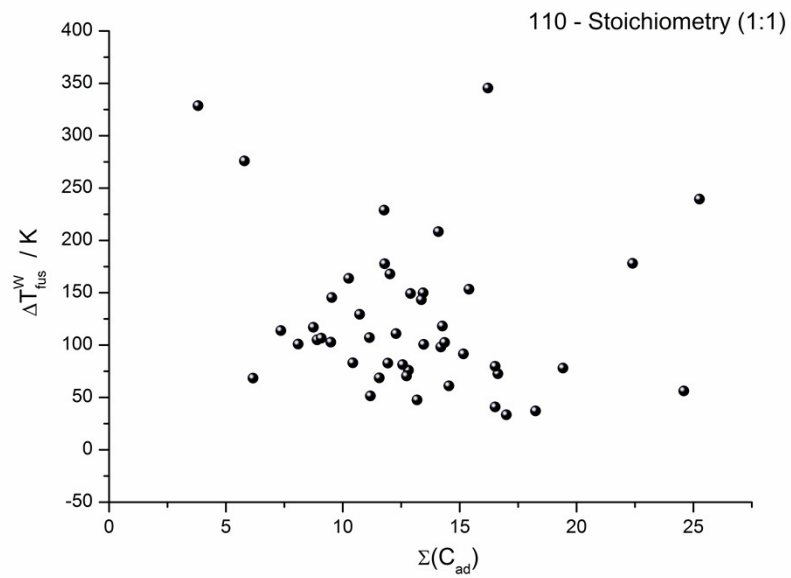

a

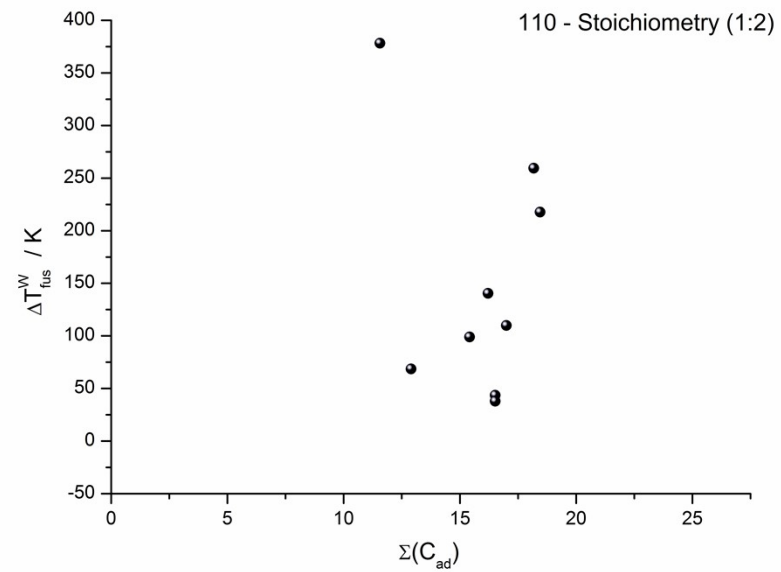

b

**Figure S4.** Dependence  $\Delta T_{fus}^W$  versus  $\Sigma(C_{ad})$  (the sum of all H-bond acceptor and donor factors in a molecule CF1).  $\Delta T_{fus}^W$ -values correspond to (110) correlation lines location for stoichiometries (1:1) (a) and (1:2) (b).



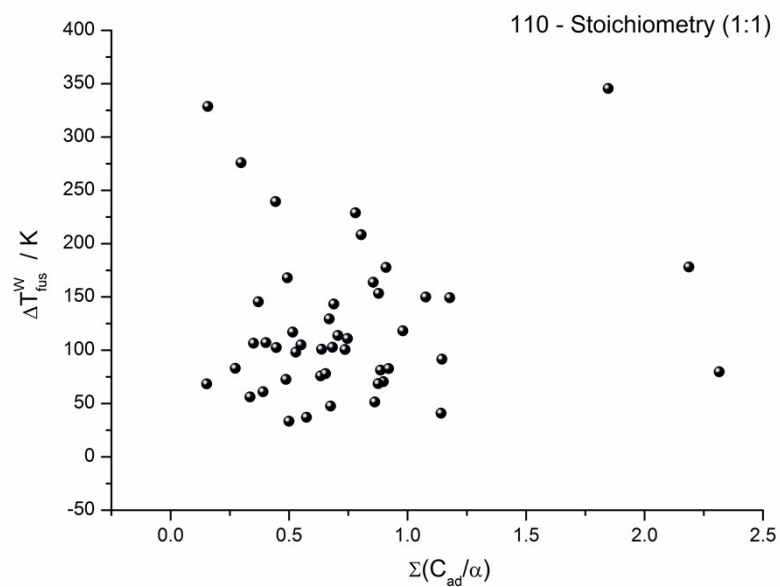

a

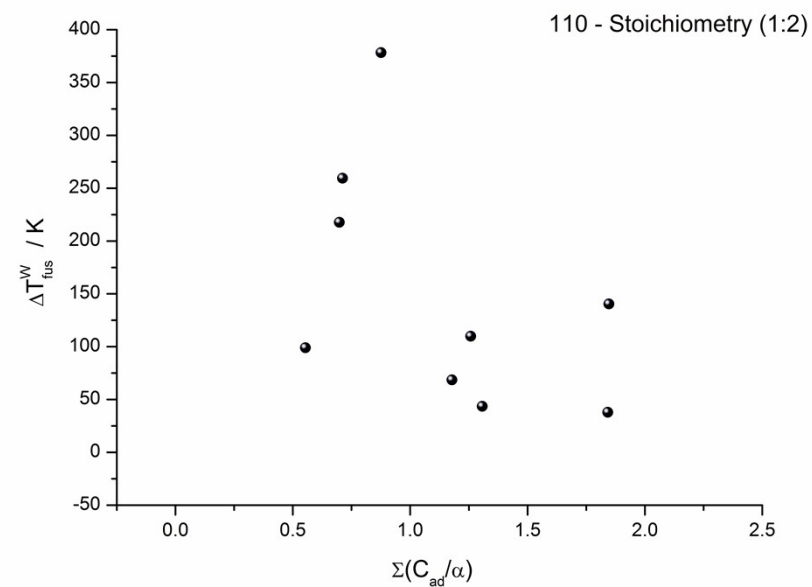

b

**Figure S5.** Dependence  $\Delta T_{fus}^W$  versus  $\Sigma(C_{ad}/\alpha)$  (the sum of all H-bond acceptor and donor factors in a molecule CF1 normalized on polarizability).  $\Delta T_{fus}^W$ -values correspond to (110) correlation lines location for stoichiometries (1:1) (a) and (1:2) (b).

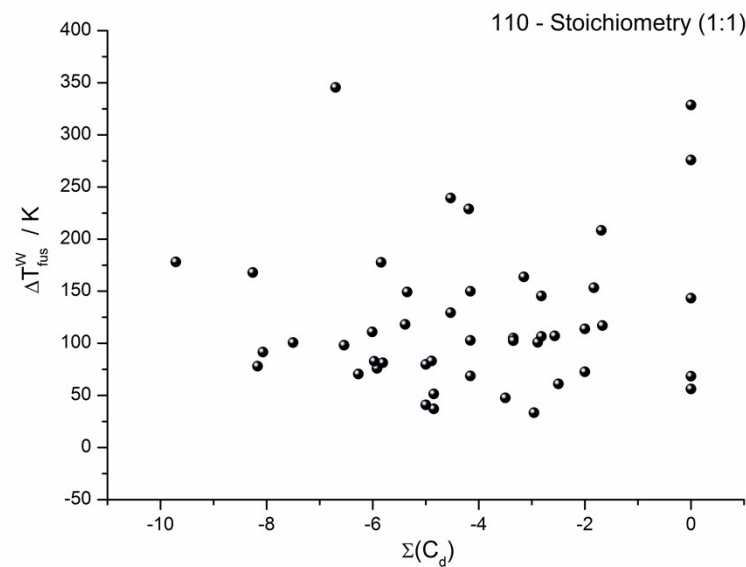

a

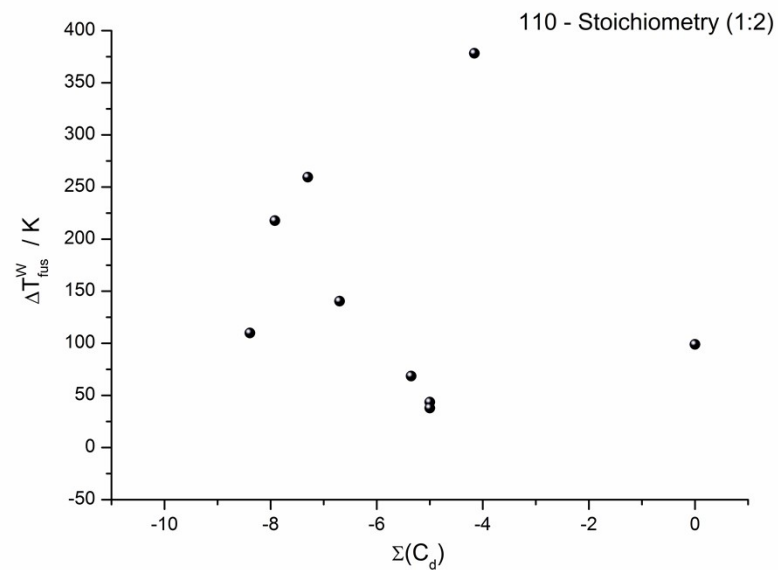

b

**Figure S6.** Dependence  $\Delta T_{fus}^W$  versus  $\Sigma(C_d)$  (the sum of all H-bond acceptor factors in a molecule CF1).  $\Delta T_{fus}^W$ -values correspond to (110) correlation lines location for stoichiometries (1:1) (a) and (1:2) (b).

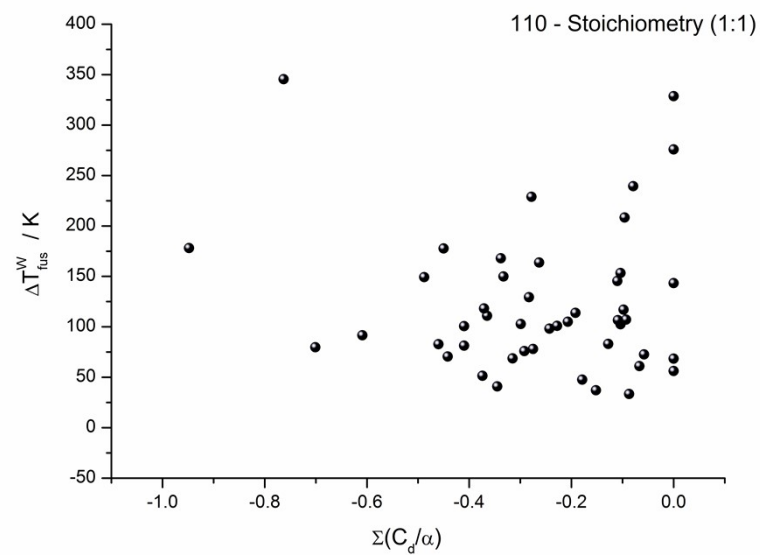

a

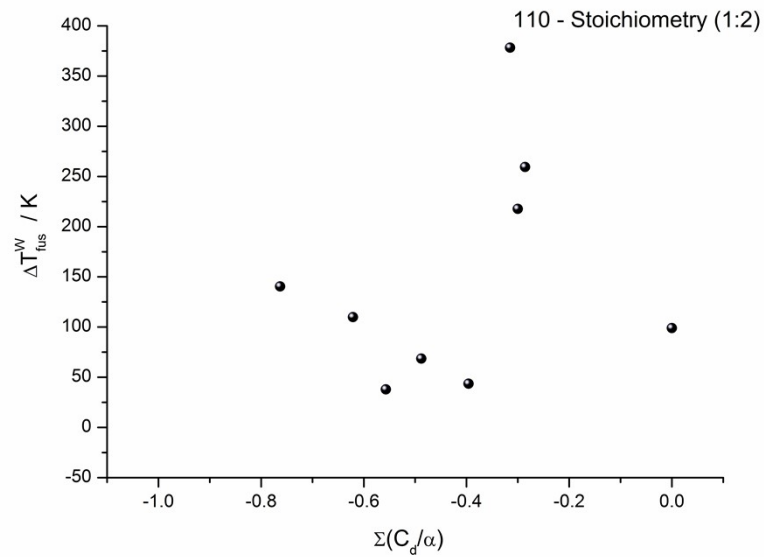

b

**Figure S7.** Dependence  $\Delta T_{fus}^W$  versus  $\Sigma(C_d/\alpha)$  (the sum of H-bond donor factors in a molecule CF1 normalized on polarizability).  $\Delta T_{fus}^W$ -values correspond to (110) correlation lines location for stoichiometries (1:1) (a) and (1:2) (b).

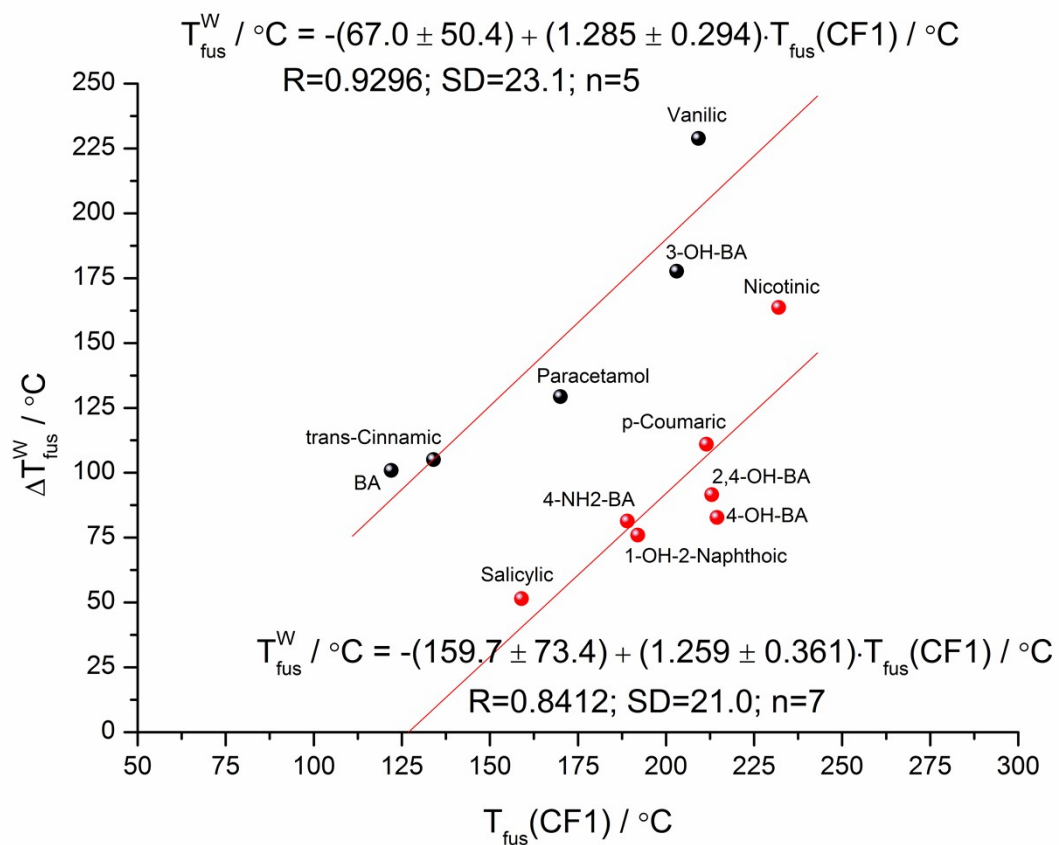

**Figure S8.** Dependence  $\Delta T_{fus}^W$  versus  $T_{fus}(CF1)$  for the cluster of structurally related compounds for benzoic acid.

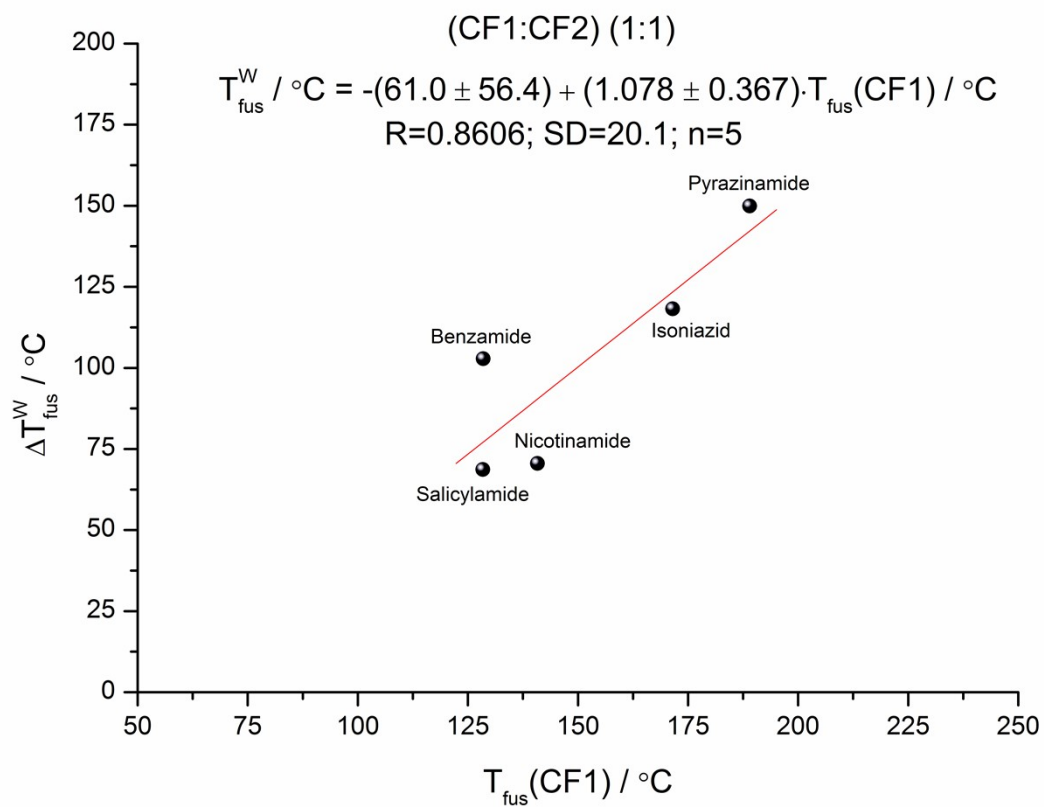

**Figure S9.** Dependence  $\Delta T_{fus}^W$  versus  $T_{fus}(CF1)$  for the cluster of structurally related benzamide compounds.

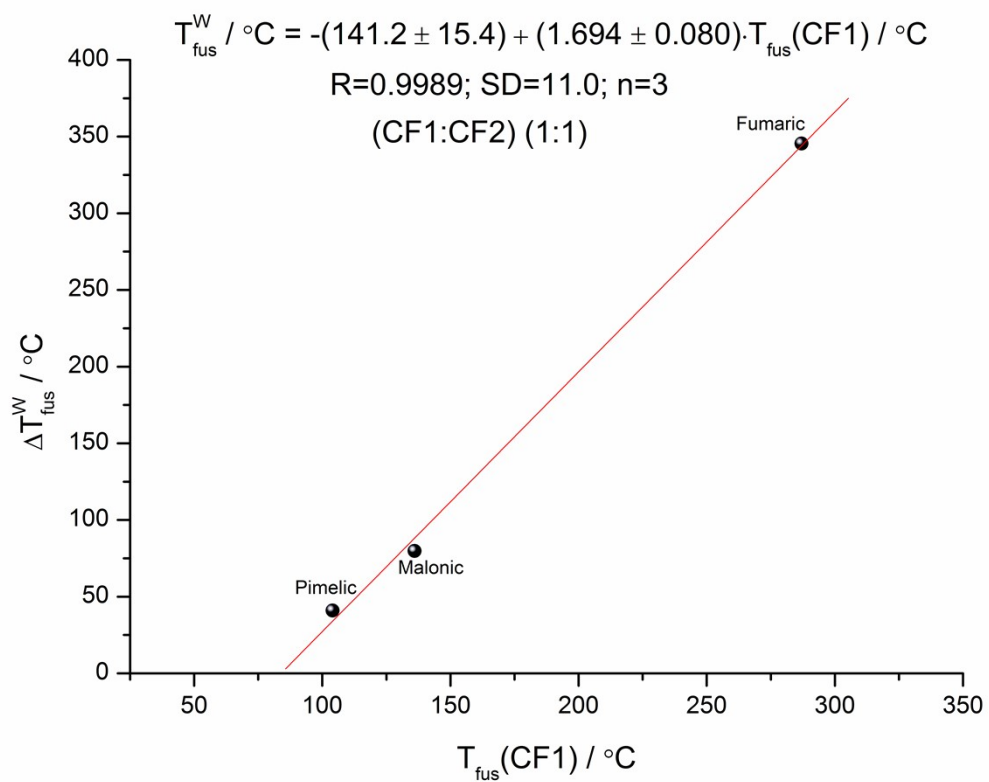

**Figure S10.** Dependence  $\Delta T_{fus}^W$  versus  $T_{fus}(CF1)$  for the cluster of structurally related dicarboxylic acids compounds.

## Examples of the approach application

We would like to demonstrate the functionality of the proposed approach on several examples. To this end, two classes of co-crystals according to their industrial application were taken into consideration. The two-component pharmaceutical crystals belong to the most accepted class.

### 1. Pharmaceutical materials

a) The following example describes the simplest case. One has some kind of active pharmaceutical ingredient (API). The task is: to select the pharmaceutically suitable co-formers to obtain the co-crystals/salts with melting points lower than those of the individual components. First of all, it is necessary to check through Table S1 on the availability of this API in the list of the compounds for which the correlation equations have been obtained. If the API is presented in Table S1, the indexes (LBH) should be analyzed. In case of (010) and (011) it is impossible to produce the two-component crystal meeting the conditions for the melting point at all choice of the second component. As opposed in the case of (110) it is possible to realize the required condition by the estimation of  $T_{fus}^E$  and  $T_{fus}^F$  temperatures (Figure 1a). Considering Imatinib mesylate ( $T_{fus}(API)=218.6\text{ }^{\circ}\text{C}$ ) for which  $T_{fus}^E=181.4\text{ }^{\circ}\text{C}$  and  $T_{fus}^F=420.9\text{ }^{\circ}\text{C}$  as an example (Table S1), evidently, there is a large “window” ( $T_{fus}^W=239.5\text{ }^{\circ}\text{C}$ ) for the melting temperatures of the second component. Therefore, it is easy to choose the suitable candidates matching the condition:  $T_{fus}^E < T_{fus}(CF) < T_{fus}^F$ . The following compounds can be used as the second component: dicarboxylic acids (oxalic, fumaric and succinic), benzoic acid derivatives such as 4-OH-Benzoic Acid (BA); 3,4-OH-BA; 3,5-OH-BA; 3,4,5-OH-BA, and so on. The data on the co-crystal with Syringic Acid are given in the literature [1]:  $T_{fus}(CC)=157^{\circ}\text{C} < T_{fus}(SyringicAcid)=207.0^{\circ}\text{C} < T_{fus}(API)=218.6^{\circ}\text{C}$ . In addition, the drugs (Meloxicam, Theophylline, Mefenamic Acid and so on) or the physiologically active substances (Naringenin, Myricetin, Luteolin) also can stand as the second component. For example, Veverka et al. [2] described the co-crystal with Quercetin:  $T_{fus}(CC)=135.0^{\circ}\text{C} < T_{fus}(API)=218.6^{\circ}\text{C} < T_{fus}(Quercetin)=321.4^{\circ}\text{C}$ .

b) If one didn't manage to find the correlation equation for API in Table S1, the attempts aimed at the selection of a co-former for a given API from Table S1 with (LBH) (110) set can be made. Besides this, for a given co-former the following condition should be realized:  $T_{fus}^E < T_{fus}(API) < T_{fus}^F$ . Nevirapine ( $T_{fus}(API)=246.5\text{ }^{\circ}\text{C}$ ) can be used as an example. As follows from Table S1, Saccharin (marked by solid) satisfies the given conditions:  $174.2 < 246.5 < 291.2$

°C. The literature [3] indicates that  $T_{fus}(CC) = 223.0^{\circ}C < T_{fus}(Saccharin) = 227.9^{\circ}C < T_{fus}(Nevirapine) = 246.5^{\circ}C$ .

## 2. Energetic materials

Only three compounds: Benzotrifuroxan, 2,4,6-Trinitrotoluene and CL20 from the list in Table S1 belong to the energetic materials. There are two opinions in the literature concerning the synthetic strategy of the two-component crystals. Some authors hold the idea of increasing the melting temperature of cocrystals/salts in comparison with individual compounds which allows to improve the storage safety of highly explosive materials. Another stand for the opposite course - production of co-crystals/salts with the melting temperatures lower than those of the individual components. In this case the storage safety decreases but the reliability and efficacy of explosion increase. Each of the three compounds demonstrates different possibilities in terms of the design of the two-component crystals with given melting points. 2,4,6-Trinitrotoluene belongs to class (010), so it is impossible to obtain the co-crystals/salts with melting points above/below the melting points of the individual compounds. Benzotrifuroxan refers to class (011), so the co-crystals/salts with the melting points below those of the individual compounds cannot be obtained. In its turn, CL20 is a member of class (110) (regardless of the stoichiometric composition), so it is impossible to obtain the co-crystals/salts with the melting points higher than the melting points of the individual compounds (within those stoichiometric compositions for which the correlation equations have been derived).

Let's consider the co-crystals/salts based on Benzotrifuroxan ( $T_{fus}(CF1) = 197.4^{\circ}C$ ). In order to produce the co-crystal with the melting point higher than those of the individual compounds it is necessary to select the second co-former (CF2). To this end, the melting temperature of the second component should be in the following range (Table S1):  $166.4^{\circ}C < T_{fus}(CF2) < 234.5^{\circ}C$ . For example, 2,4,6-trinitroaniline ( $T_{fus}(CF2) = 184.2^{\circ}C$ ) can be the second component. Zhang et al. [4] described such two-component crystal:  $T_{fus}(2,4,6-Trinitroaniline) = 184.2^{\circ}C < T_{fus}(Benzotrifuroxan) = 197.4^{\circ}C < T_{fus}(CC) = 205.8^{\circ}C$ .

Let's consider the co-crystals/salts based on CL20 ( $T_{fus}(CF1) = 244.0^{\circ}C$ ) with (1:2) (CL20:CF2) stoichiometry. In order to obtain the cocrystal/salt with the melting point lower than the melting points of the individual components, the second co-former (CF2) should be chosen. For this, the melting temperature of the second component should be in the following interval (Table S1):  $170.4^{\circ}C < T_{fus}(CF2) < 269.4^{\circ}C$ . For example, 4-methyl-5-nitroimidazole ( $T_{fus}(CF2) = 249.0$



°C) can serve as the second component. Such two-component crystal  $T_{fus}(CC) = 221.0^{\circ}C < T_{fus}(4\text{-methyl-5-nitroimidazole}) = 249.0^{\circ}C < T_{fus}(CL20) = 244^{\circ}C$  is described in the literature [5].

### References

- [1] M. Reggane, J. Wiest, M. Saedtler, C. Harlacher, M. Gutmann, S. H. Zottnick, P. Piechon, I. Dix, K. Müller-Buschbaum, U. Holzgrabe, L. Meinel, *Eur. J. Pharm. Biopharm.*, 2018, **128**, 290–299. <https://doi.org/10.1016/j.ejpb.2018.05.012>
- [2] M. Veverka, P. Simon, J. Gallovic, V. Jorik, E. Veverkova, T. Dubaj, *Monatsh Chem*, 2012, 1405–1415. DOI 10.1007/s00706-012-0788-3
- [3] M. R. Caira, S. A. Bourne, H. Samsodien, E. Engel, W. Liebenberg, N. Stieger, M. Aucamp, *CrystEngComm*, **2012**, 14, 2541-2551. <https://doi.org/10.1039/C2CE06507J>
- [4] H. Zhang, C. Guo, X. Wang, J. Xu, X. He, Y. Liu, X. Liu, H. Huang, J. Sun, *Cryst. Growth Des.*, **2013**, 2, 679-687. <https://doi.org/10.1021/cg301353f>
- [5] Y. Liu, P. Lv, C. Sun, S. Pang, *Z. Anorg. Allg. Chem.*, **2019**, 656-662. DOI: 10.1002/zaac.201900017
